# Supplementary material for: Polymer brush on surface with tunable hydrophilicity using SAM formation of zwitterionic 4-vinylpyridine-based polymer
Source: Royal Society of Chemistry journal article supplement (doi:10.1039/c7nj02971c), 2018-01-01
Supplement: c7nj02971c1.pdf [file c7nj02971c1.pdf]

Supplementary Information for:

## Polymer brush on surface with tunable hydrophilicity using SAM formation of zwitterionic 4-vinylpyridine-based polymer†

P. Murugan,<sup>a</sup> P. Ramar,<sup>a,b</sup> Asit Baran Mandal,<sup>b,c</sup> and Debasis Samanta<sup>\*a,b</sup>

<sup>a</sup>*Polymer Science & Technology Department, CSIR-Central Leather Research Institute (CSIR-CLRI),  
Adyar, Chennai-600020, India. Fax: 91-44-24911589, Tel: 91 -44 24422059 E-mail: debasis@clri.res.in,  
debasis.samanta@gmail.com*

<sup>b</sup>*Academy of Scientific and Innovative Research (AcSIR), India*

<sup>c</sup>*CSIR-CGCRI, Kolkata, India*

### Synthesis of 3-(2-bromoethoxy)-3-oxopropanoic acid (BEOPA)

We took it 50 ml single neck round bottom flask and degassed with N<sub>2</sub> gas. We added simultaneously 4000 mg (27.75 mmol) of Meldrum's acid in 20 ml of dry toluene and 2-bromo ethanol 3460 mg, 27.75 mmol under N<sub>2</sub> atmosphere. The reaction mixture was refluxed at 120 °C for 2 hours. After completion of the reaction, the reaction mixture was washed with 40 mL of saturated NaHCO<sub>3</sub> solution and separated out the aqueous layer. These aqueous layers acidified with Conc. HCl up to pH-4 and extracted with 200 ml ethyl acetate for two times. The organic layer was dried over with anhydrous Na<sub>2</sub>SO<sub>4</sub> and we got light yellow colour viscose liquid. The organic compound was purified by column chromatography by using (100-200 mesh silica gel) gradient column chromatography (PE: CHCl<sub>3</sub>- 5%, 10%) (Yield: 62%)<sup>1,2</sup>

#### Scheme. S1

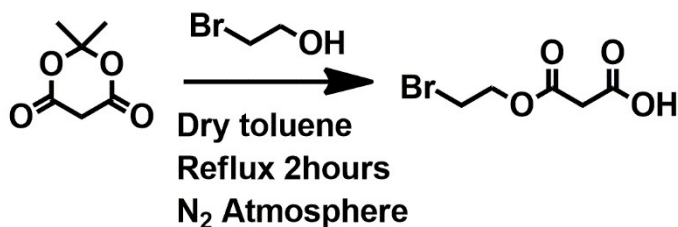

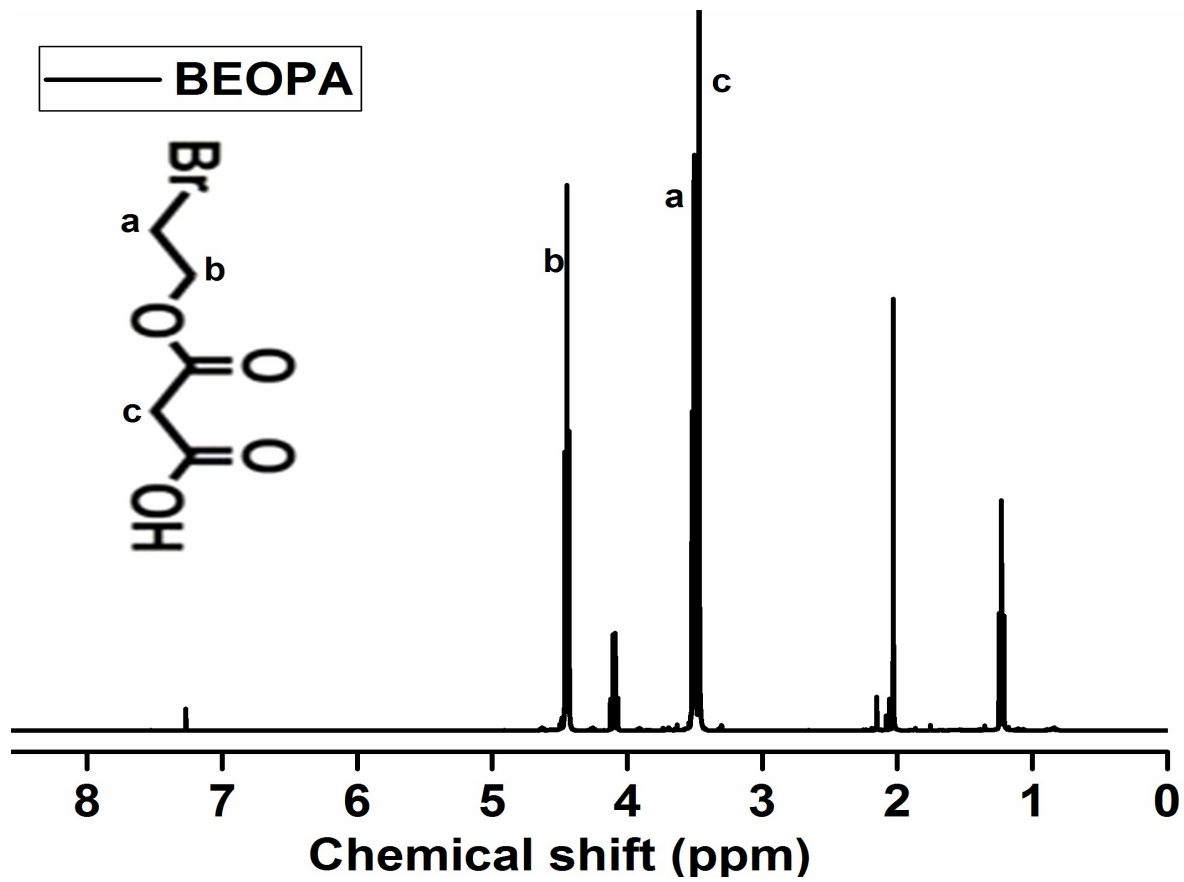

Fig. S1:  $^1\text{H}$  NMR spectrum of 3-(2-bromoethoxy)-3-oxopropanoic acid (BEOPA)

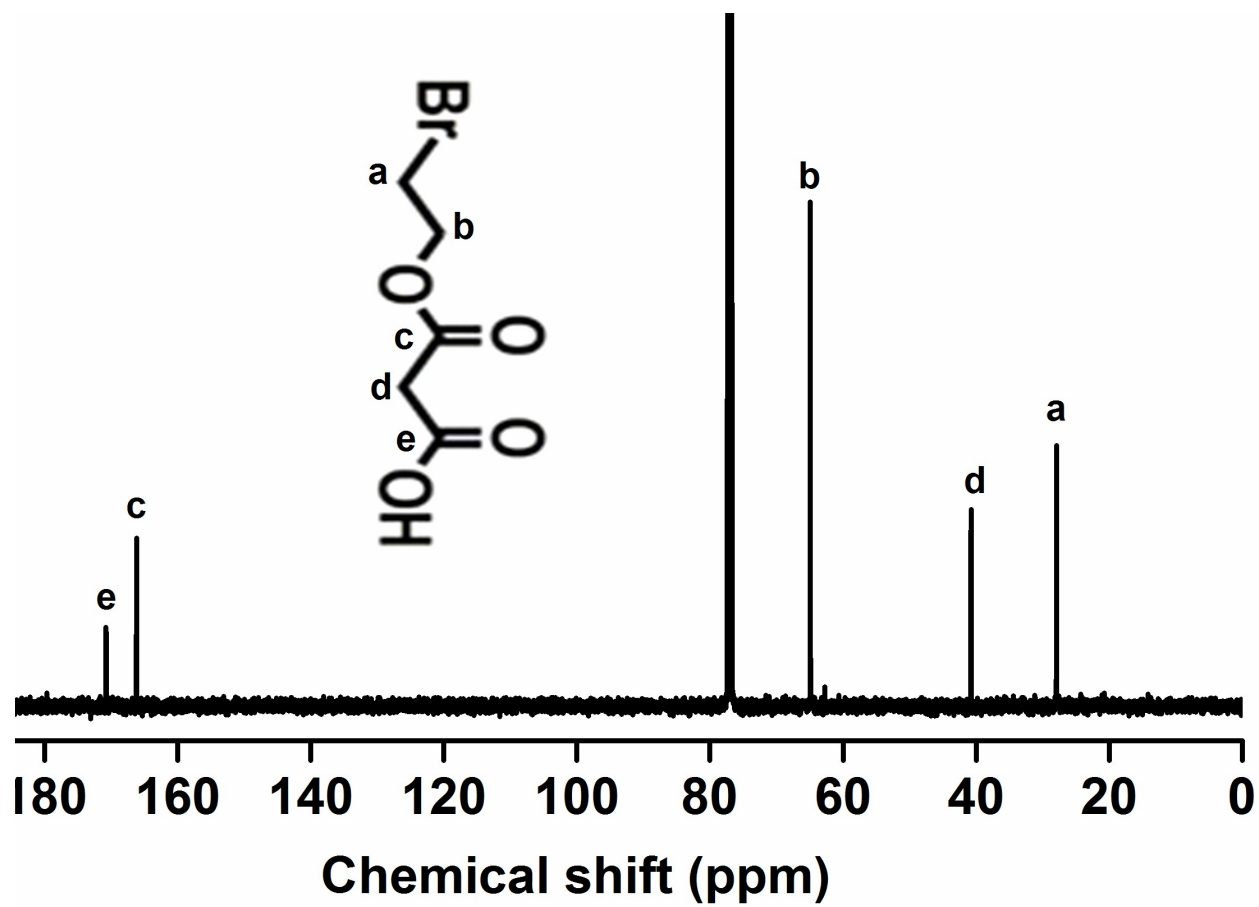

Fig. S2:  $^{13}\text{C}$  NMR spectrum of 3-(2-bromoethoxy)-3-oxopropanoic acid (BEOPA)

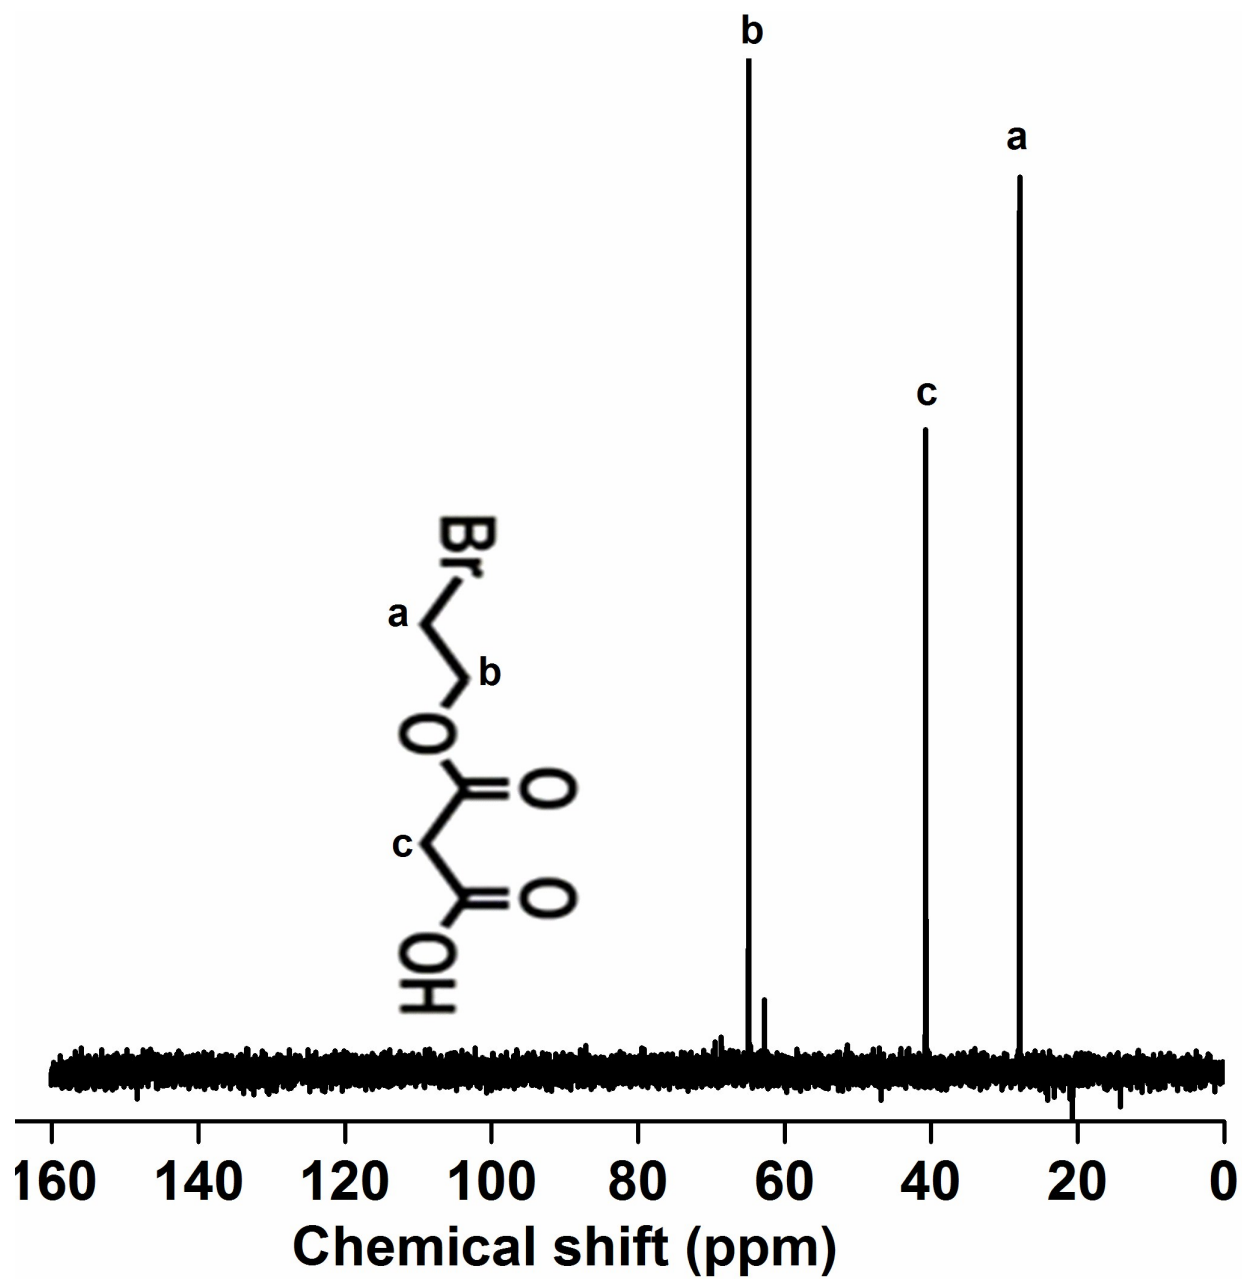

Fig.S3: DEPT NMR spectrum of 3-(2-bromoethoxy)-3-oxopropanoic acid (BEOPA)

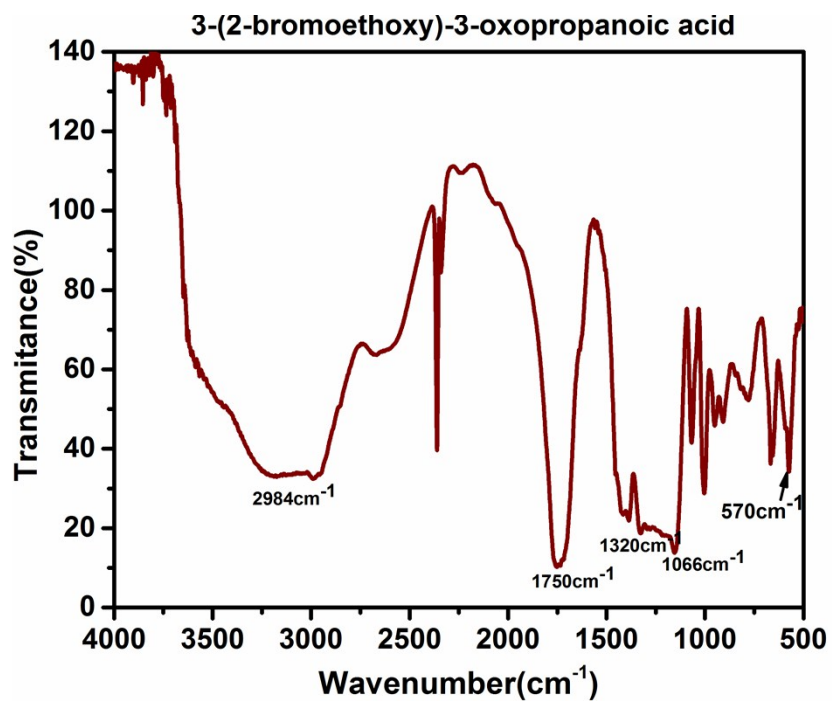

Fig. S4: FT-IR spectrum of 3-(2-bromoethoxy)-3-oxopropanoic acid (BEOPA)

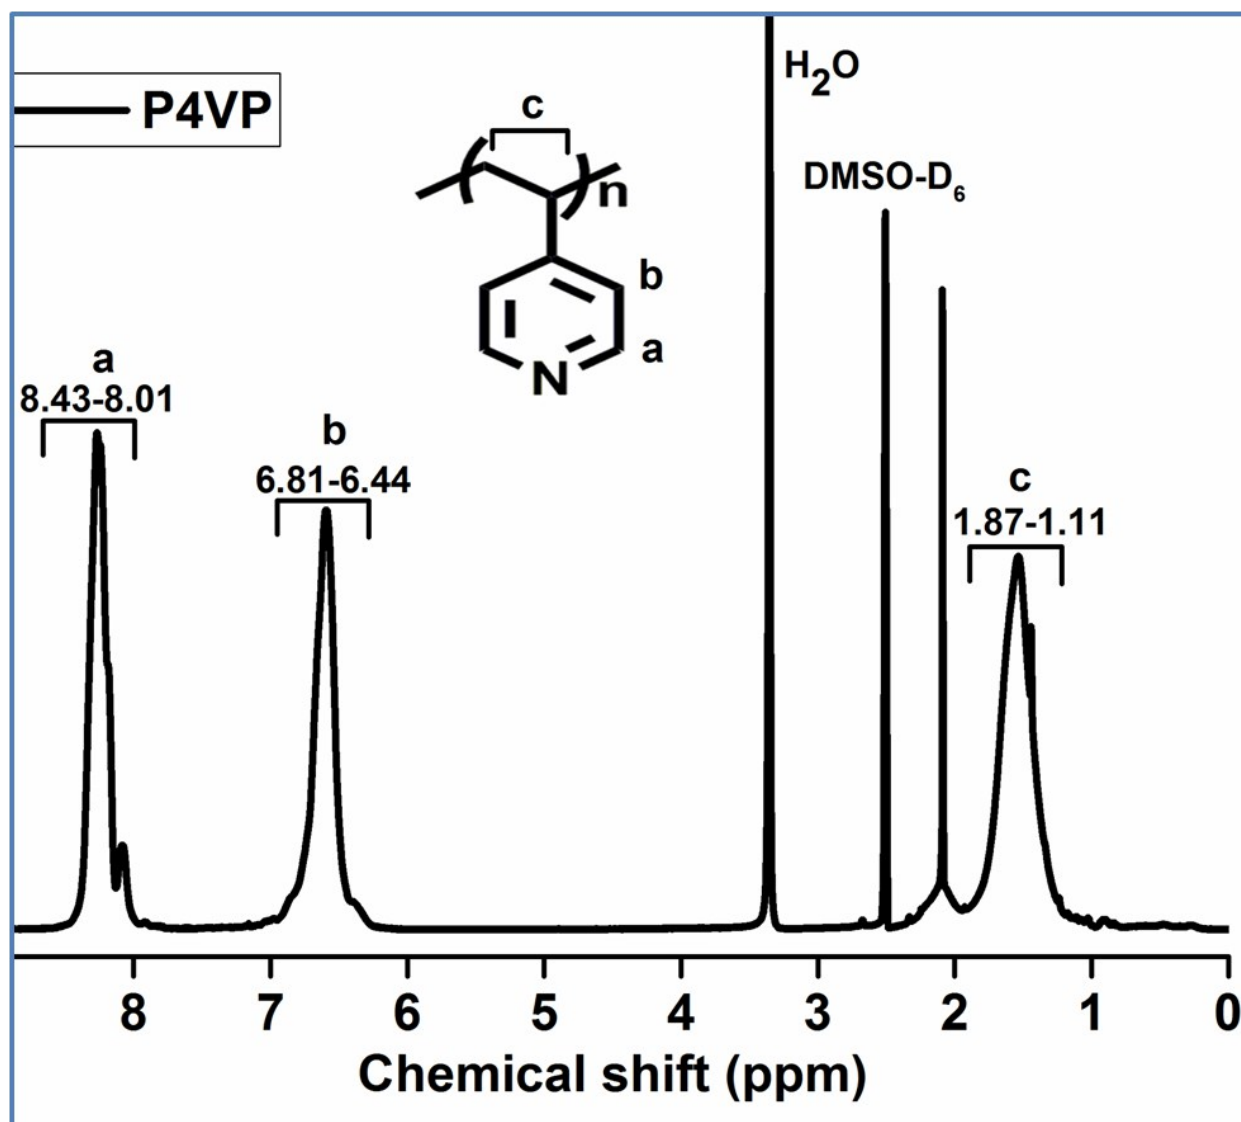

Fig. S5:  $^1\text{H}$  NMR spectrum of poly 4-vinylpyridine (P4VP)

**Scheme. S2:** Attempted quaternization of poly4-vinylpyridine with 1-octanoic acid. (control reaction-P4VPOA)  
(Failure)

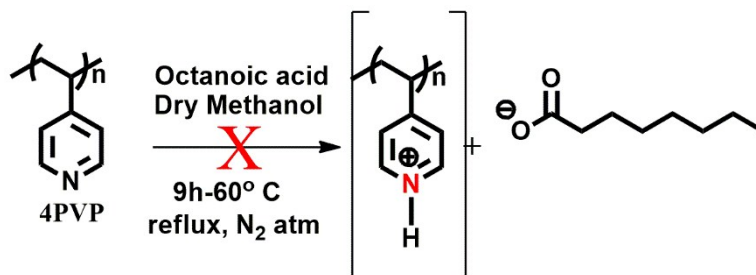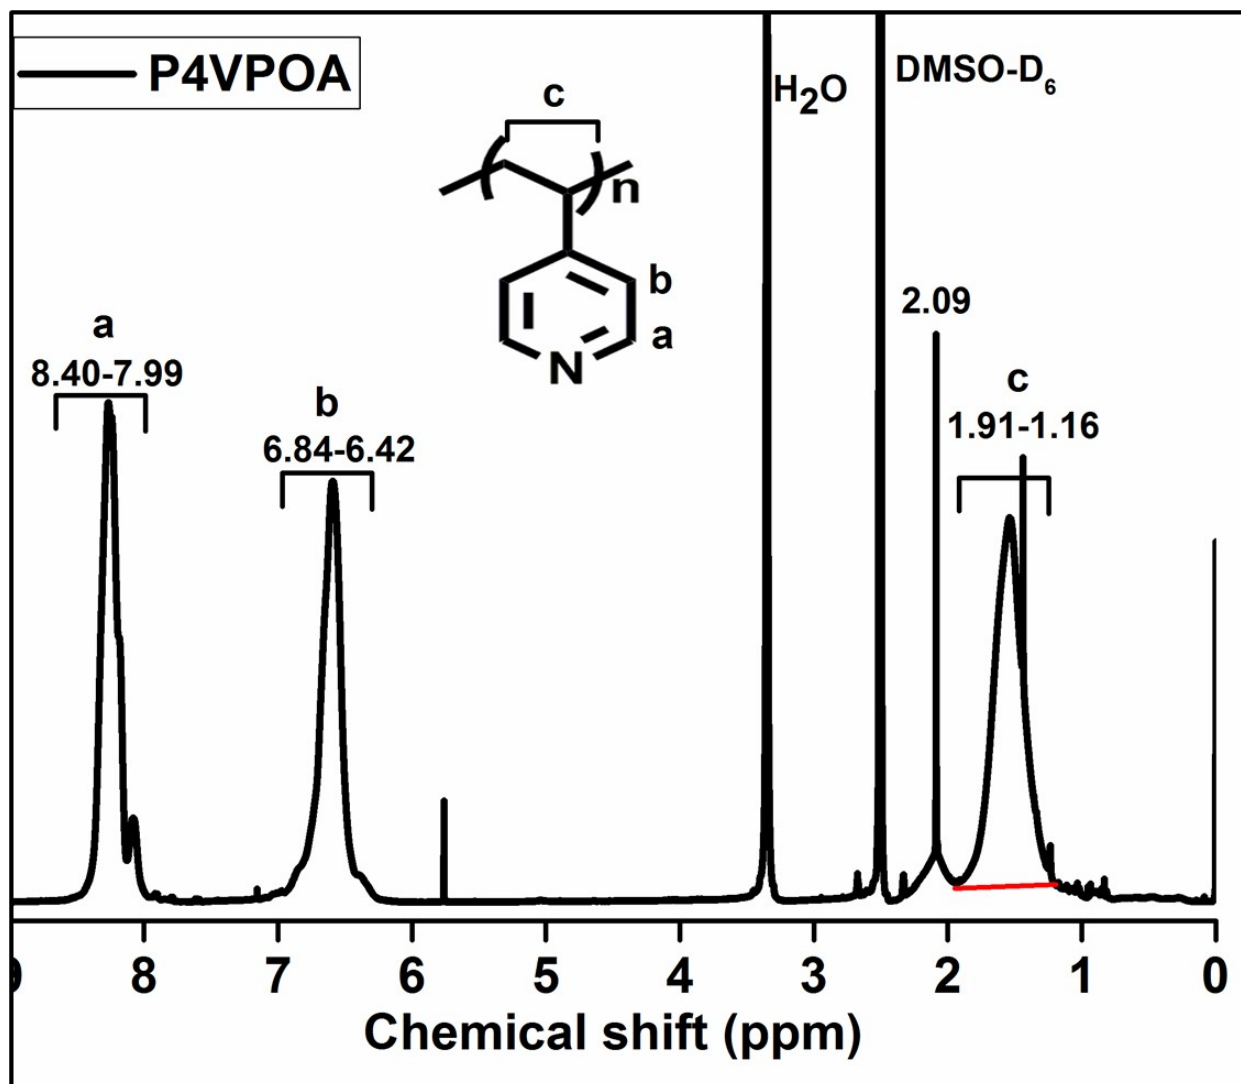

Fig. S6: <sup>1</sup>H NMR spectrum of control reaction (P4VPOA)

**Scheme. S3:** Attempted quaternization of poly4-vinylpyridine with 3-(2-bromoethoxy)-3-oxopropanoic acid (QP4VPA)

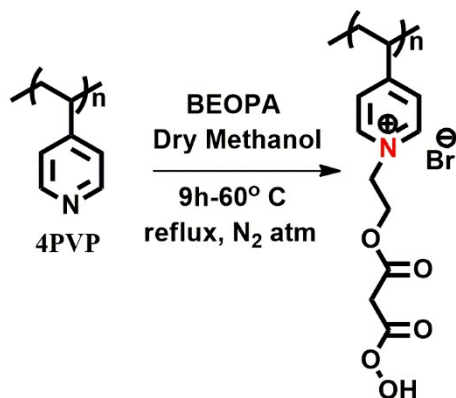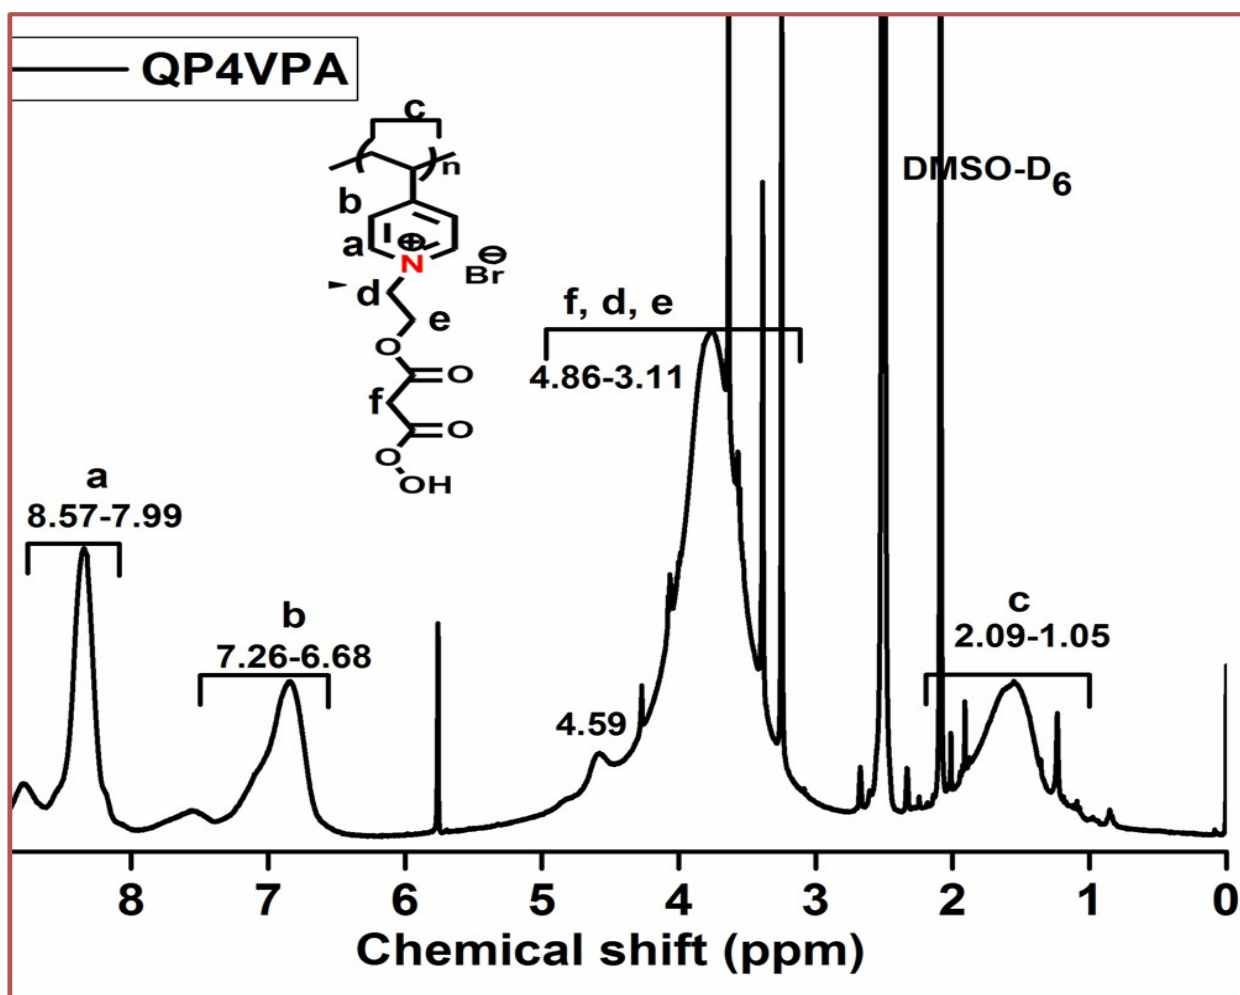

Fig. S7: <sup>1</sup>H NMR spectrum of model reaction (QP4VPA)



**Scheme. S4:** Attempted quaternization of poly4-vinylpyridine with 3-(2-bromoethoxy)-3-oxopropanoic acid and 3-iodopropyltrimethoxysilane (QP4VPSA)

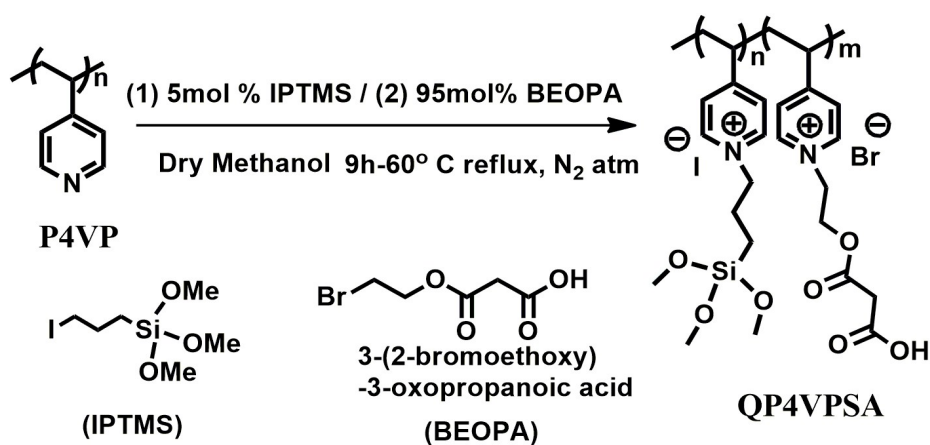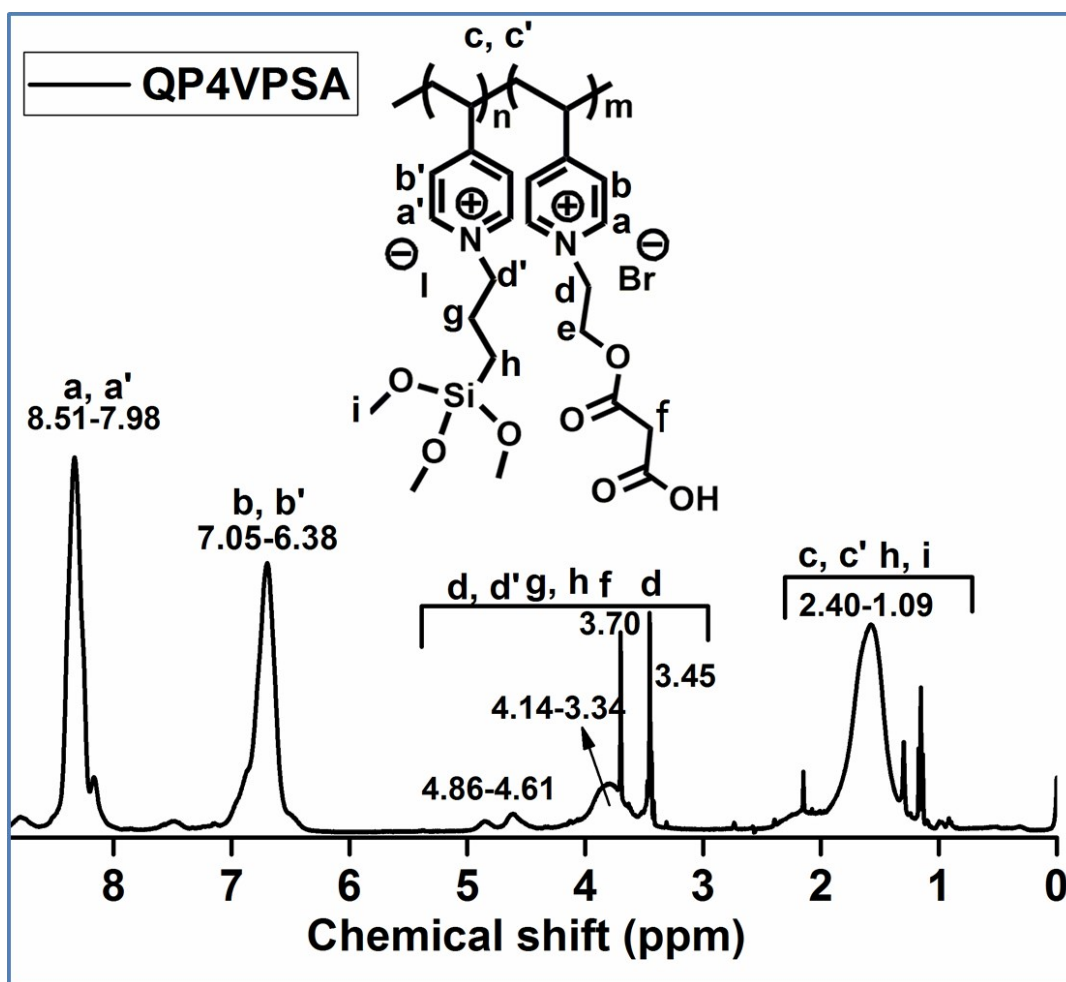

Fig. S8: <sup>1</sup>H NMR spectrum of QP4VPSA polymers

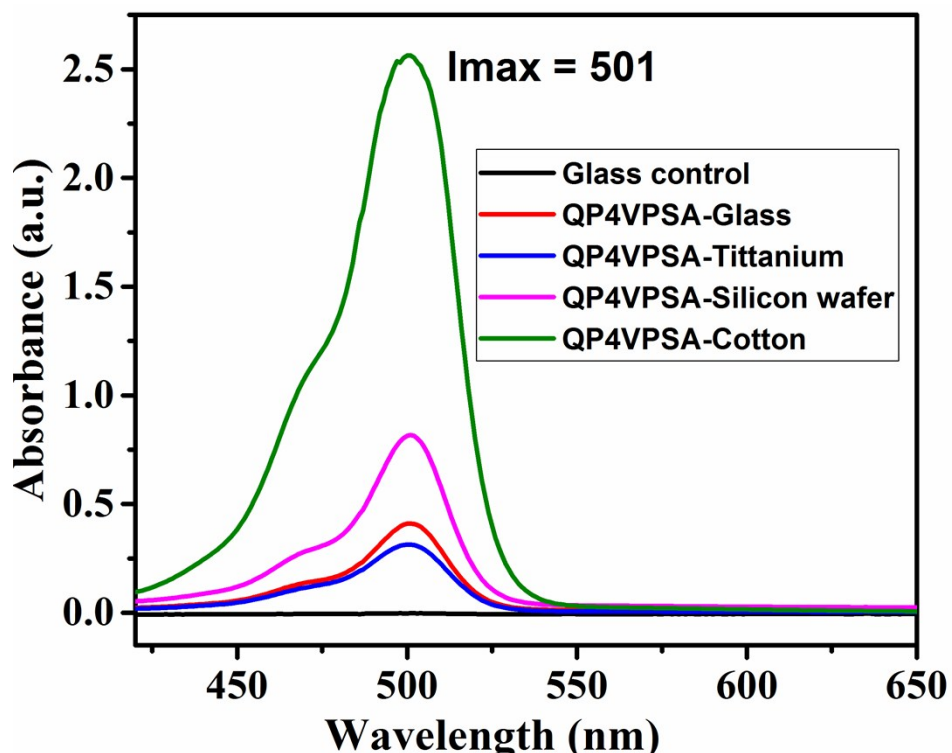

Fig. S9. UV-vis spectra of desorbed fluorescein salt solution after treatment of polymeric SAM on the surface with fluorescein salt followed by treatment with 0.5 mol % were hexadecyltrimethylammonium bromide solutions.

**Reference:**

1. P. Witte, F. Beuerle, U. Hartnagel, R. Lebovitz, A. Savouchkina, S. Sali, D. Guldi, N. Chronakis and A. Hirsch, *Organic & Biomolecular Chemistry*, 2007, **5**, 3599-3613.
2. O. Bouloussa, F. Rondelez and V. Semetey, *Chem. Commun.*, 2008, 951-953.
